# Supplementary material for: Whole genome sequence, SNP chips and pedigree structure: building demographic profiles in domestic dog breeds to optimize genetic trait mapping
Source: Oxford University Press journal article supplement (doi:10.1242/dmm.027037), 2016-01-01
Supplement: dmm027037supp.pdf [file dmm027037supp.pdf]

**Table S1:** Inbreeding coefficients calculated from SNP data, whole genome sequencing (WGS), and pedigree analysis of entire reference pedigrees, 10-generation pedigrees, and 5-generation pedigrees. Percent identity to the Boxer reference is the mean of all SNP-genotyped dogs of each breed.

| Breed                         | Abbr. | SNP   | WGS   | PED <sub>all</sub> | PED <sub>10-gen</sub> | PED <sub>5-gen</sub> |
|-------------------------------|-------|-------|-------|--------------------|-----------------------|----------------------|
| Afghan Hound                  | AFGH  | 0.332 |       |                    |                       |                      |
| Airedale Terrier              | AIRT  |       | 0.467 |                    |                       |                      |
| Akita                         | AKIT  | 0.347 |       |                    |                       |                      |
| Alaskan Malamute              | AMAL  | 0.313 | 0.199 |                    |                       |                      |
| American Cocker Spaniel       | ACKR  | 0.378 | 0.378 |                    |                       |                      |
| American Rat Terrier          | ARTR  |       | 0.383 |                    |                       |                      |
| Australian Cattle Dog         | ACD   |       | 0.185 | 0.067              | 0.064                 | 0.038                |
| Australian Shepherd           | AUSS  | 0.207 |       |                    |                       |                      |
| Australian Terrier            | AUST  | 0.260 |       |                    |                       |                      |
| Basenji                       | BSJI  | 0.536 | 0.571 | 0.221              | 0.118                 | 0.059                |
| Basset Hound                  | BASS  | 0.357 |       |                    |                       |                      |
| Beagle                        | BEAG  | 0.244 | 0.084 |                    |                       |                      |
| Bearded Collie                | BRDC  |       | 0.261 |                    |                       |                      |
| Belgian Malinois              | BMAL  |       | 0.265 |                    |                       |                      |
| Belgian Shepherd              | BELS  | 0.301 | 0.286 | 0.193              | 0.126                 | 0.064                |
| Belgian Tervuren              | TERV  | 0.264 | 0.357 |                    |                       |                      |
| Bernese Mountain Dog          | BMD   | 0.350 | 0.314 | 0.197              | 0.061                 | 0.022                |
| Black Russian Terrier         | BRTR  |       | 0.263 |                    |                       |                      |
| Bloodhound                    | BLDH  | 0.431 | 0.316 |                    |                       |                      |
| Border Collie                 | BORD  | 0.210 | 0.254 |                    |                       |                      |
| Border Terrier                | BORT  |       | 0.379 |                    |                       |                      |
| Borzoi                        | BORZ  | 0.311 | 0.265 | 0.128              | 0.086                 | 0.054                |
| Boston Terrier                | BOST  | 0.225 | 0.316 |                    |                       |                      |
| Bouvier des Flandres          | BOUV  |       | 0.314 |                    |                       |                      |
| Boxer                         | BOX   | 0.357 |       |                    |                       |                      |
| Briard                        | BRIA  | 0.298 |       |                    |                       |                      |
| Brittany                      | BRIT  | 0.263 | 0.331 |                    |                       |                      |
| Bull Mastiff                  | BULM  | 0.345 |       |                    |                       |                      |
| Bull Terrier                  | BULT  | 0.579 |       |                    |                       |                      |
| Bulldog                       | BULD  | 0.373 | 0.454 |                    |                       |                      |
| Cairn Terrier                 | CAIR  | 0.193 |       |                    |                       |                      |
| Cardigan Welsh Corgi          | CARD  | 0.250 |       |                    |                       |                      |
| Cavalier King Charles Spaniel | CKCS  | 0.421 |       |                    |                       |                      |
| Chihuahua                     | CHIH  | 0.113 | 0.099 |                    |                       |                      |
| Chinese Crested               | CRES  |       | 0.374 |                    |                       |                      |
| Chinese Shar Pei              | SHAR  | 0.236 |       |                    |                       |                      |
| Chow Chow                     | CHOW  | 0.370 | 0.374 |                    |                       |                      |
| Clumber Spaniel               | CLSP  |       | 0.475 |                    |                       |                      |
| Collie                        | COLL  | 0.481 |       |                    |                       |                      |
| Dachshund                     | DACH  | 0.203 | 0.422 |                    |                       |                      |
| Doberman Pinscher             | DOBP  | 0.431 | 0.385 |                    |                       |                      |

|                                    |      |       |       |       |       |       |
|------------------------------------|------|-------|-------|-------|-------|-------|
| English Cocker Spaniel*            | ECKR | 0.390 | 0.494 |       |       |       |
| English Springer Spaniel           | ESSP | 0.312 | 0.352 |       |       |       |
| Eurasier                           | EURA |       | 0.254 |       |       |       |
| Flat Coated Retriever              | FCR  | 0.354 | 0.324 |       |       |       |
| French Bulldog                     | FBUL | 0.281 | 0.287 |       |       |       |
| German Shepherd Dog                | GSD  | 0.373 | 0.479 |       |       |       |
| German Shorthaired Pointer         | GSHP | 0.176 |       |       |       |       |
| German Wirehaired Pointer          | GWHP |       | 0.223 |       |       |       |
| Giant Schnauzer                    | GSNZ | 0.252 |       |       |       |       |
| Glen of Imaal Terrier*             | GLEN | 0.277 |       |       |       |       |
| Golden Retriever                   | GOLD | 0.284 | 0.218 | 0.160 | 0.079 | 0.027 |
| Great Dane                         | DANE | 0.272 | 0.377 |       |       |       |
| Great Pyrenees                     | GPYR | 0.350 | 0.381 |       |       |       |
| Greater Swiss Mountain Dog         | GSMD |       | 0.420 |       |       |       |
| Greyhound                          | GREY | 0.300 | 0.314 |       |       |       |
| Havanese                           | HAVA | 0.178 |       |       |       |       |
| Ibizan Hound                       | IBIZ | 0.289 |       |       |       |       |
| Irish Setter                       | ISET |       | 0.319 |       |       |       |
| Irish Terrier                      | IRTR |       | 0.322 |       |       |       |
| Irish Water Spaniel                | IWSP | 0.267 | 0.323 |       |       |       |
| Irish Wolfhound                    | IWOF | 0.426 | 0.399 |       |       |       |
| Italian Greyhound                  | ITGY | 0.292 | 0.338 |       |       |       |
| Jack Russell Terrier               | JRT  |       | 0.117 |       |       |       |
| Kerry Blue Terrier                 | KERY |       | 0.425 |       |       |       |
| Komondor                           | KOMO |       | 0.316 |       |       |       |
| Kromforlander                      | KROM |       | 0.468 |       |       |       |
| Kuvasz                             | KUVZ | 0.171 |       |       |       |       |
| Labrador Retriever                 | LAB  | 0.217 | 0.211 | 0.082 | 0.073 | 0.026 |
| Lagotto Romagnolo                  | LAGO |       | 0.378 |       |       |       |
| Leonberger                         | LEON | 0.316 |       |       |       |       |
| Mastiff                            | MAST | 0.335 | 0.270 |       |       |       |
| Miniature Bull Terrier             | MBLT | 0.507 |       |       |       |       |
| Miniature Pinscher                 | MPIN | 0.307 |       |       |       |       |
| Miniature Poodle                   | MPOO | 0.237 | 0.255 |       |       |       |
| Miniature Schnauzer                | MSNZ | 0.452 | 0.564 |       |       |       |
| Newfoundland                       | NEWF | 0.288 |       |       |       |       |
| Norwegian Lundehund                | NLUN |       | 0.868 |       |       |       |
| Norwich Terrier                    | NOWT | 0.408 |       | 0.267 | 0.167 | 0.057 |
| Nova Scotia Duck Tolling Retriever | NSDT |       | 0.205 | 0.266 | 0.251 | 0.034 |
| Old English Sheepdog               | OES  | 0.276 |       |       |       |       |
| Papillon                           | PAPI | 0.179 |       | 0.059 | 0.051 | 0.031 |
| Pekingese                          | PEKE | 0.356 | 0.379 |       |       |       |

|                              |      |       |       |       |       |       |
|------------------------------|------|-------|-------|-------|-------|-------|
| Pembroke Welsh Corgi         | PEMB | 0.301 | 0.329 |       |       |       |
| Petit Basset Griffon Vendeen | PBGV | 0.236 |       |       |       |       |
| Pointer                      | PNTR |       | 0.255 |       |       |       |
| Pomeranian                   | POM  | 0.180 |       |       |       |       |
| Portuguese Podengo           | POPO |       | 0.166 |       |       |       |
| Portuguese Water Dog         | PTWD | 0.270 | 0.118 | 0.176 | 0.162 | 0.052 |
| Pug                          | PUG  | 0.442 | 0.383 |       |       |       |
| Rhodesian Ridgeback          | RHOD |       | 0.331 |       |       |       |
| Rottweiler                   | ROTT | 0.337 | 0.280 |       |       |       |
| Saint Bernard                | STBD | 0.296 | 0.214 |       |       |       |
| Saluki                       | SALU | 0.234 | 0.159 |       |       |       |
| Samoyed                      | SAMO | 0.301 | 0.281 |       |       |       |
| Scottish Deerhound           | DEER | 0.459 | 0.420 |       |       |       |
| Scottish Terrier             | SCOT | 0.346 | 0.322 |       |       |       |
| Shetland Sheepdog            | SSHP | 0.386 | 0.354 |       |       |       |
| Shih Tzu                     | SHIH | 0.325 |       |       |       |       |
| Siberian Husky               | HUSK | 0.327 | 0.100 |       |       |       |
| Sloughi                      | SLOU |       | 0.065 |       |       |       |
| Soft Coated Wheaten Terrier  | SCWT |       | 0.474 |       |       |       |
| Spanish Water Dog            | SPWD |       | 0.117 |       |       |       |
| Staffordshire Bull Terrier   | STAF | 0.299 |       |       |       |       |
| Standard Poodle              | SPOO | 0.181 | 0.249 |       |       |       |
| Standard Schnauzer           | SSNZ | 0.255 | 0.283 |       |       |       |
| Tibetan Mastiff              | TIBM |       | 0.118 |       |       |       |
| Tibetan Terrier              | TIBT |       | 0.140 |       |       |       |
| Toy Poodle                   | TPOO | 0.182 | 0.117 |       |       |       |
| West Highland White Terrier  | WHWT | 0.357 | 0.419 |       |       |       |
| Whippet                      | WHIP | 0.324 |       |       |       |       |
| Yorkshire Terrier            | YORK | 0.254 | 0.147 |       |       |       |

\* SNP F-values for ECKR and GLEN were calculated from 9 individuals instead of 1

**Table S2:** Whole genome sequence quality metrics and sources

| Name   | Variants  | Average Depth | Source               |
|--------|-----------|---------------|----------------------|
| ACKR01 | 5,054,866 | 33.713        | Decker et al. 2015   |
| ARTR01 | 5,099,158 | 40.002        | PRJNA318762          |
| AIRT02 | 5,204,116 | 28.623        | PRJNA263947          |
| AMAL01 | 4,736,533 | 37.749        | PRJNA318762          |
| ACD01  | 4,935,757 | 17.836        | PRJEB13468           |
| BEAG01 | 4,797,005 | 40.359        | Decker et al. 2015   |
| BELS01 | 4,973,385 | 35.936        | Decker et al. 2015   |
| BLDH01 | 4,999,169 | 33.431        | Decker et al. 2015   |
| BMAL01 | 5,136,968 | 9.438         | Wang et al. 2013     |
| BMD01  | 4,979,710 | 36.058        | Decker et al. 2015   |
| BMD02  | 5,065,175 | 39.096        | PRJNA318762          |
| BORD02 | 5,031,466 | 16.033        | Decker et al. 2015   |
| BORT01 | 5,113,993 | 21.11         | PRJNA263947          |
| BORZ01 | 4,962,089 | 40.516        | PRJNA318762          |
| BOST01 | 5,151,014 | 41.779        | PRJNA318762          |
| BOUV01 | 5,027,893 | 46.821        | PRJNA318762          |
| BRDC01 | 5,016,518 | 17.328        | PRJEB13468           |
| BRIT01 | 5,243,695 | 8.478         | Decker et al. 2015   |
| BRTR01 | 5,026,403 | 29.47         | PRJNA263947          |
| BSJI01 | 5,386,656 | 5.201         | Freedman et al. 2014 |
| BULD01 | 5,327,606 | 39.587        | Decker et al. 2015   |
| CHIH01 | 4,796,797 | 41.391        | Decker et al. 2015   |
| CHOW01 | 5,489,944 | 4.457         | Decker et al. 2015   |
| CHOW02 | 4,733,596 | 46.627        | Decker et al. 2015   |
| CLSP01 | 4,830,777 | 15.489        | Decker et al. 2015   |
| CRES03 | 4,696,633 | 19.026        | PRJNA261736          |
| DACH01 | 5,173,689 | 15.057        | Decker et al. 2015   |
| DANE01 | 5,093,550 | 43.995        | Decker et al. 2015   |
| DEER01 | 5,133,707 | 22.681        | PRJNA263947          |
| DOBP01 | 4,690,581 | 26.809        | Decker et al. 2015   |
| ECKR02 | 5,527,883 | 6.285         | PRJNA263947          |
| ESSP01 | 5,084,780 | 25.765        | PRJNA263947          |
| EUR01  | 5,002,113 | 10.735        | PRJEB6079            |
| FBUL01 | 5,173,531 | 18.228        | PRJEB13468           |
| FCR01  | 4,999,924 | 47.452        | Decker et al. 2015   |
| FCR02  | 5,038,664 | 36.299        | Decker et al. 2015   |
| FCR03  | 5,063,014 | 36.002        | PRJNA318762          |
| GOLD01 | 4,977,578 | 30.888        | Decker et al. 2015   |
| GPYR01 | 5,146,474 | 16.122        | Decker et al. 2015   |
| GREY07 | 5,045,975 | 36.383        | PRJNA247491          |
| GREY01 | 5,221,305 | 14.221        | Decker et al. 2015   |

|        |           |        |                    |
|--------|-----------|--------|--------------------|
| GSD01  | 5,354,584 | 8.636  | Wang et al. 2013   |
| GSMD01 | 5,117,279 | 36.148 | PRJNA318762        |
| GWHP01 | 4,954,916 | 20.896 | PRJEB13468         |
| HUSK01 | 4,648,407 | 46.636 | Decker et al. 2015 |
| IRTR01 | 5,094,366 | 18.957 | PRJEB13468         |
| ISET01 | 5,007,794 | 38.254 | PRJNA318762        |
| ITGY01 | 5,091,056 | 20.088 | Decker et al. 2015 |
| IWOF01 | 5,111,487 | 34.234 | Decker et al. 2015 |
| IWSP01 | 4,965,143 | 42.841 | PRJNA318762        |
| IWSP02 | 5,005,180 | 42.469 | PRJNA318762        |
| IWSP03 | 5,109,996 | 41.355 | PRJNA318762        |
| JRT01  | 4,921,017 | 24.849 | PRJNA263947        |
| KERY01 | 5,216,770 | 22.316 | PRJNA263947        |
| KOMO01 | 4,998,899 | 39.872 | PRJNA318762        |
| KROM01 | 5,200,404 | 22.237 | PRJEB6076          |
| LAB04  | 5,000,603 | 28.266 | PRJNA263947        |
| LAGO01 | 5,479,537 | 6.462  | PRJEB13468         |
| MAST01 | 5,041,589 | 50.977 | Decker et al. 2015 |
| MPOO01 | 4,946,955 | 41.789 | PRJNA318762        |
| MSNZ01 | 5,708,610 | 5.265  | PRJNA263947        |
| NLUN01 | 5,546,324 | 20.074 | PRJNA186960        |
| NSDT01 | 4,929,427 | 21.895 | PRJNA263947        |
| PEKE01 | 4,995,474 | 44.938 | Decker et al. 2015 |
| PEMB02 | 5,086,521 | 21.515 | PRJNA263947        |
| PNTR01 | 5,036,900 | 18.147 | Decker et al. 2015 |
| POPO01 | 4,909,232 | 23.586 | PRJNA263947        |
| PTWD01 | 4,759,535 | 36.337 | PRJNA318762        |
| PUG05  | 5,251,865 | 12.06  | Decker et al. 2015 |
| RHOD01 | 5,086,725 | 18.091 | Decker et al. 2015 |
| ROTT01 | 4,968,608 | 33.229 | Decker et al. 2015 |
| ROTT04 | 5,021,172 | 40.855 | PRJNA318762        |
| SALU01 | 4,750,584 | 46.554 | Decker et al. 2015 |
| SAMO01 | 4,892,384 | 40.68  | PRJNA318762        |
| SCOT01 | 5,097,777 | 39.698 | Decker et al. 2015 |
| SCOT02 | 4,914,841 | 37.802 | PRJNA318762        |
| SCWT01 | 5,350,393 | 14.183 | PRJNA263947        |
| SLOU01 | 4,740,780 | 19.944 | PRJNA318762        |
| SPOO01 | 5,090,679 | 11.104 | Decker et al. 2015 |
| SPWD01 | 4,888,534 | 14.514 | PRJEB7903          |
| SSHP01 | 5,028,406 | 36.223 | Decker et al. 2015 |
| SSNZ01 | 5,070,274 | 14.846 | PRJNA263947        |
| STBD01 | 4,938,360 | 34.199 | Decker et al. 2015 |
| TERV01 | 5,053,248 | 32.35  | Decker et al. 2015 |

|        |           |        |                    |
|--------|-----------|--------|--------------------|
| TIBM01 | 4,849,992 | 10.493 | Wang et al. 2013   |
| TIBT01 | 4,818,133 | 24.428 | PRJNA263947        |
| TPOO01 | 4,825,194 | 41.563 | Decker et al. 2015 |
| WHWT01 | 5,278,603 | 9.701  | Decker et al. 2015 |
| WHWT02 | 5,122,584 | 37.589 | PRJNA318762        |
| YORK01 | 4,924,101 | 19.177 | PRJNA318762        |

---



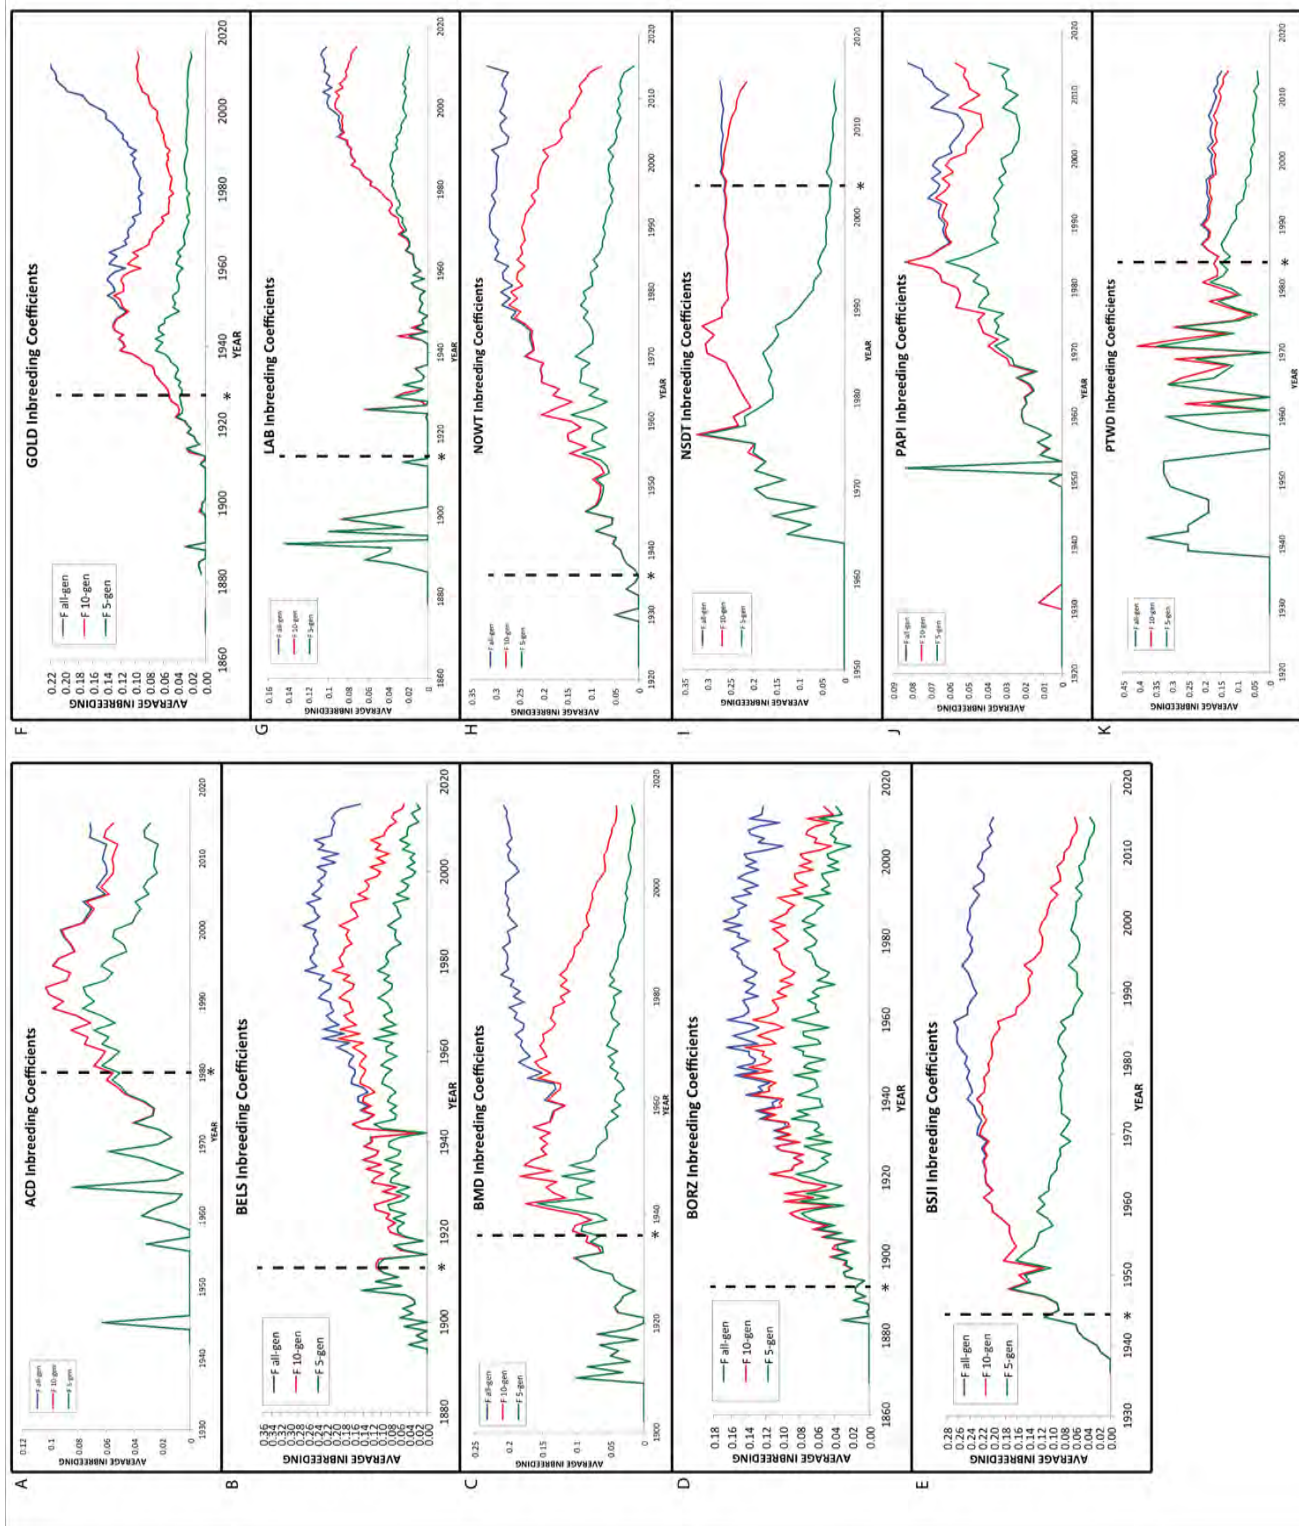

**Figure S1:** Inbreeding coefficients over time for 11 pedigree breeds. Calculations of F completed using the entire reference pedigree, or the most recent 10 or 5 generations.

\* indicate the year at which the breed was recognized by the AKC. Australian Cattle Dog (ACD) = 1980, Belgian Sheepdog (BELS) = 1912, Bernese Mountain Dog (BMD) = 1937, Borzoi (BORZ) = 1891, Basenji (BSJI) = 1944, Golden Retriever (GOLD) = 1920, Labrador Retriever (LAB) = 1917, Norwich Terrier (NOWT) = 1936, Nova Scotia Duck Tolling Retriever (NSDT) = 2003, Papillon (PAPI) = 1915, Portuguese Water Dog (PTWD) = 1983.

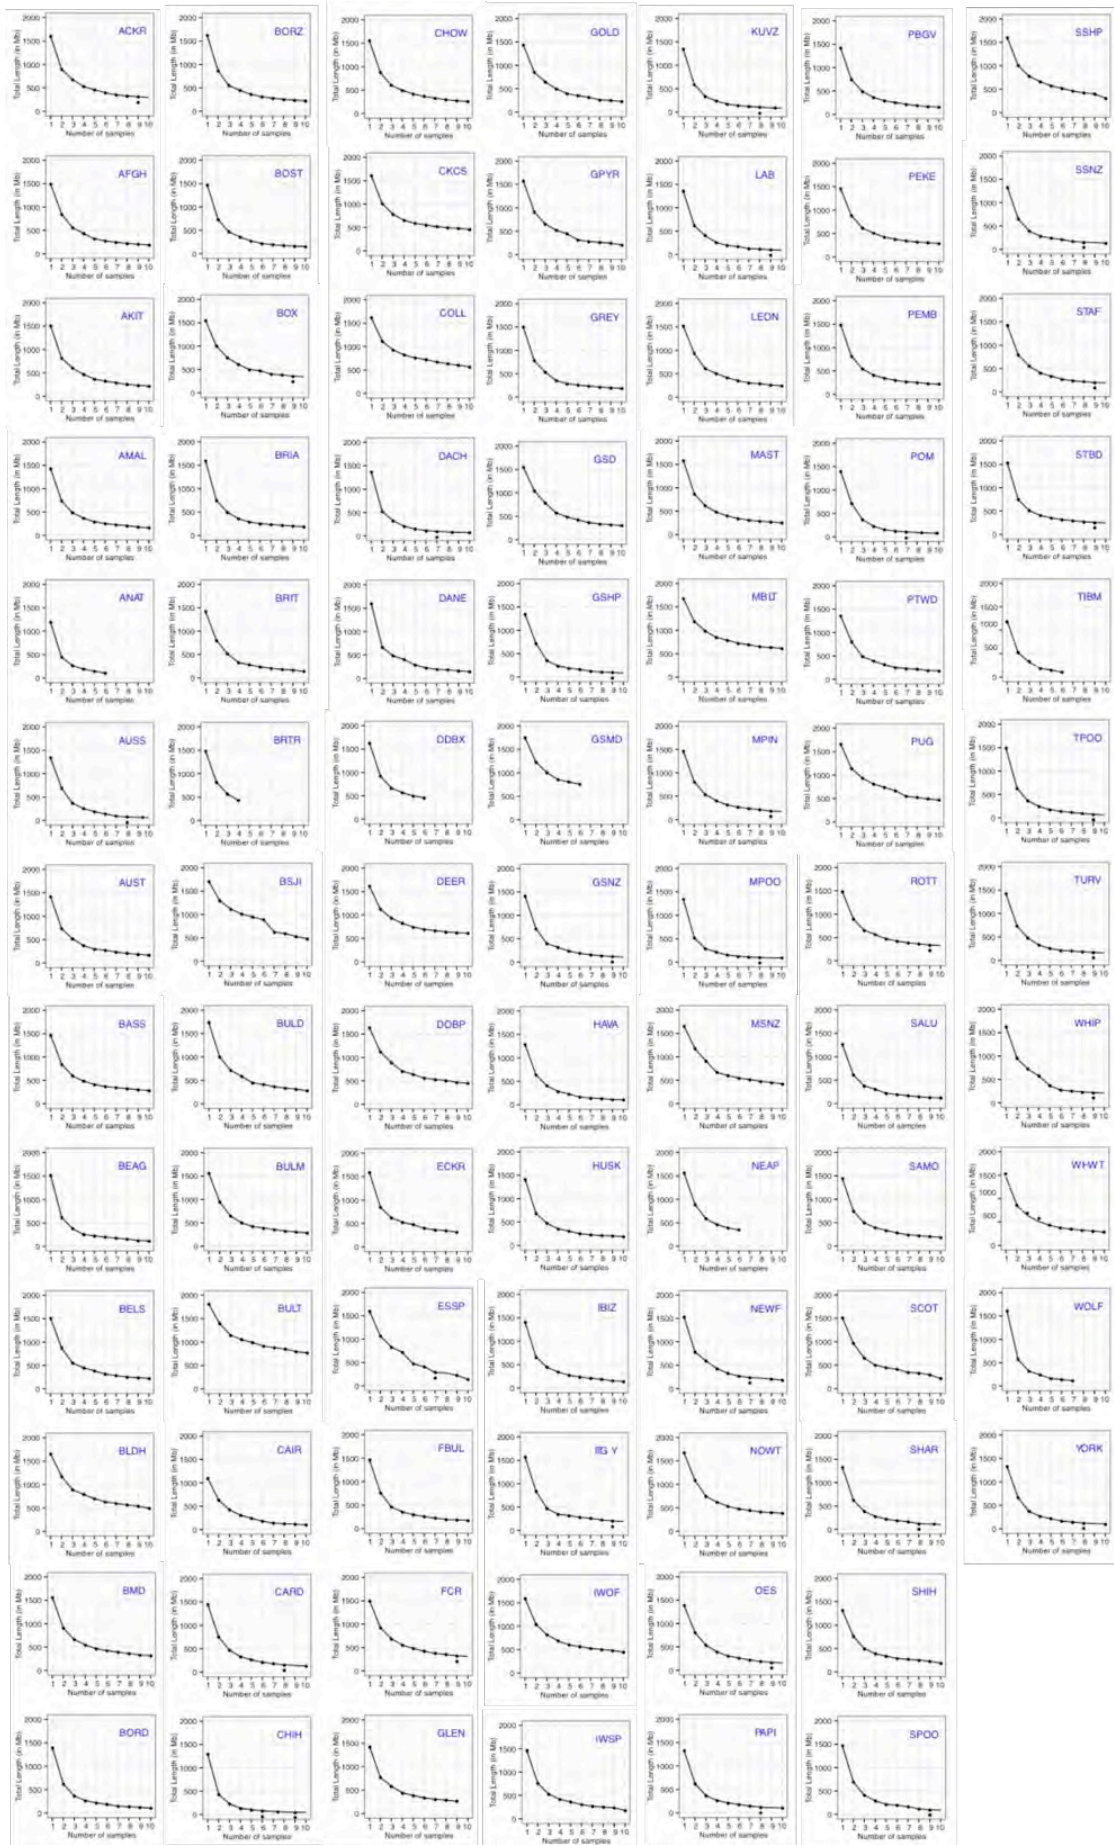

**Figure S2:** Single breed graphs displaying the decrease in shared LnP with SNP chip data from an additional same-breed dog.
